# Supplementary material
Source: MDPI journal article supplement (https://www.mdpi.com/search?q=nutrients-13-00418)
Supplement: s001 [file nutrients-13-00418-s001.pdf]

**Table S1.** Comparison of selected food intake frequency (times/weekly) by dietary diversity score in older adults in the 2014–2016 Nutrition and Health Survey in Taiwan.

| Characteristic     | DDS       |            |            |            | <i>p</i> for trend |
|--------------------|-----------|------------|------------|------------|--------------------|
|                    | ≤ 3       | 4          | 5          | 6          |                    |
| <i>n</i> (%)       | 76 (6.0)  | 287 (23.7) | 532 (49.7) | 219 (20.6) |                    |
| Dairy products     | 0.15±0.04 | 0.30±0.04  | 0.32±0.03  | 1.00±0.09  | <0.001             |
| Whole grains       | 0.14±0.06 | 0.33±0.06  | 0.46±0.05  | 0.52±0.07  | <0.001             |
| Vegetables         | 2.17±0.24 | 2.70±0.13  | 3.38±0.10  | 3.83±0.25  | <0.001             |
| Mushroom           | 0.98±0.23 | 0.98±0.11  | 1.82±0.15  | 2.10±0.34  | <0.001             |
| Pickled vegetables | 0.13±0.05 | 0.15±0.03  | 0.12±0.01  | 0.08±0.01  | 0.074              |
| Fruits             | 0.86±0.12 | 0.75±0.06  | 1.36±0.05  | 1.69±0.09  | <0.001             |
| Soybean products   | 0.55±0.14 | 0.43±0.04  | 0.47±0.03  | 0.47±0.04  | 0.967              |
| Fish and seafood   | 0.98±0.12 | 0.84±0.06  | 1.12±0.07  | 1.28±0.11  | 0.001              |
| Eggs               | 0.37±0.05 | 0.35±0.03  | 0.41±0.03  | 0.39±0.02  | 0.348              |
| Livestock          | 0.06±0.04 | 0.01±0.00  | 0.02±0.00  | 0.02±0.00  | 0.291              |
| Poultry            | 0.21±0.04 | 0.18±0.02  | 0.20±0.01  | 0.20±0.02  | 0.626              |
| Processed meat     | 0.15±0.05 | 0.11±0.02  | 0.13±0.01  | 0.14±0.03  | 0.767              |
| Nuts and seeds     | 0.09±0.02 | 0.20±0.03  | 0.30±0.03  | 0.41±0.05  | <0.001             |
| Tea                | 0.32±0.07 | 0.34±0.04  | 0.41±0.04  | 0.40±0.05  | 0.201              |
| Coffee             | 0.36±0.12 | 0.21±0.05  | 0.27±0.03  | 0.28±0.04  | 0.816              |
| Snacks             | 0.32±0.04 | 0.38±0.06  | 0.39±0.03  | 0.57±0.06  | 0.003              |
| Fried food         | 0.03±0.01 | 0.02±0.01  | 0.03±0.01  | 0.01±0.00  | 0.515              |
| Sweetened beverage | 3.98±0.83 | 2.48±0.43  | 2.28±0.20  | 2.34±0.39  | 0.145              |

*P* for trend were performed by linear regression.
